# Supplementary material for: Effect of Doping Temperatures and Nitrogen Precursors on the Physicochemical, Optical, and Electrical Conductivity Properties of Nitrogen-Doped Reduced Graphene Oxide
Source: PubMed Central journal article supplement (PMC6829554; doi:10.3390/ma12203376), 2019-10-16
Supplement: materials-12-03376-s001.pdf [file materials-12-03376-s001.pdf]

# Effect of Doping Temperatures and Nitrogen Precursors on the Physicochemical, Optical, and Electrical Conductivity Properties of Nitrogen-Doped Reduced Graphene Oxide

Nonjabulo P.D. Ngidi, Moses A. Ollengo and Vincent O. Nyamori \*

School of Chemistry and Physics, University of KwaZulu-Natal, Westville Campus, Private Bag X54001, Durban 4000, South Africa; nonjabulongidi@gmail.com (N.P.D.N.); mosesollengo@gmail.com (M.A.O.)

\* Correspondence: nyamori@ukzn.ac.za; Tel.: +27-31-2608256, Fax: +27-31-2603091.

Received: 10 September 2019; Accepted: 5 October 2019; Published: date

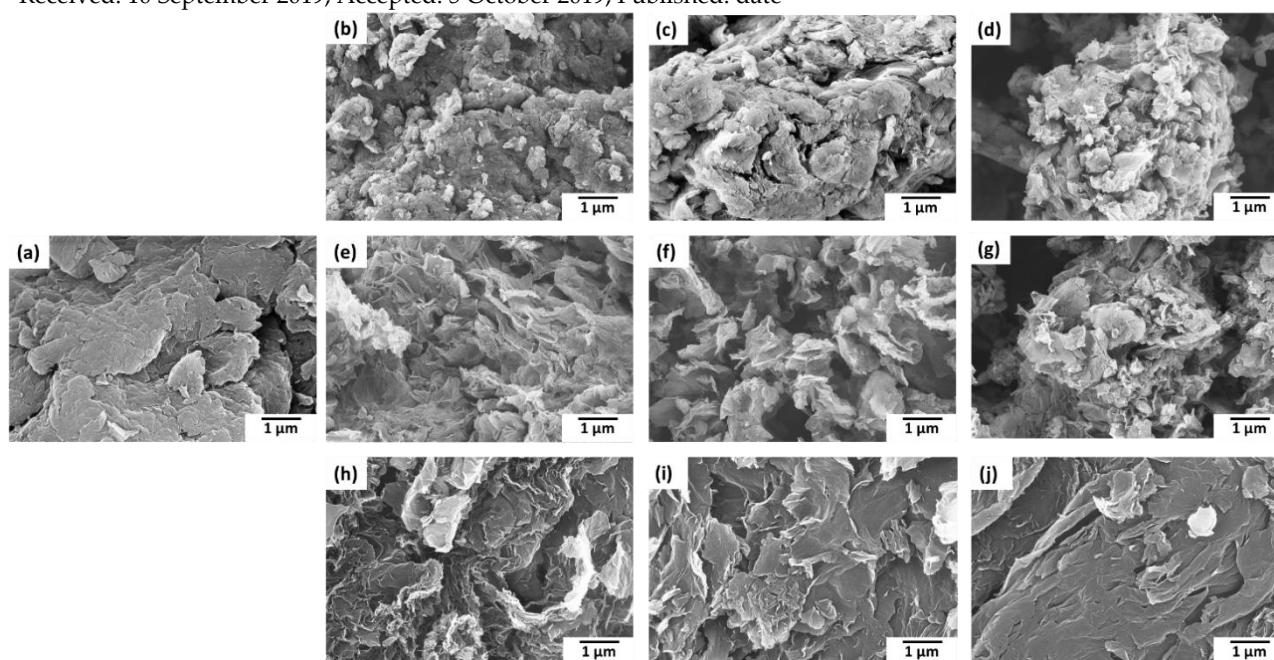

**Figure S1.** SEM images of (a) GO, (b) N-rGO-1N-600 °C, (c) N-rGO-1N-700 °C, (d) N-rGO-1N-800 °C, (e) N-rGO-2N-600 °C, (f) N-rGO-2N-700 °C, (g) N-rGO-2N-800 °C, (h) N-rGO-3N-600 °C, (i) N-rGO-3N-700 °C and (j) N-rGO-3N-800 °C. Table S1: Atomic percentage (%) of N 1s and C 1s peak binding energy (eV).

**Table S1.** Atomic percentage (%) of N 1s and C 1s peak binding energy (eV).

| Sample   | Element | Atomic % | Peak Binding Energy (eV) | Compound (s) | Peak Area % |
|----------|---------|----------|--------------------------|--------------|-------------|
| N-rGO-1N | C       | 84.5     | 284.8 ± 0.1 eV           | C-C          | 76          |
|          |         |          | 285.6 ± 0.1 eV           | C-N          | 2           |
|          |         |          | 286.4 ± 0.1 eV           | C-O          | 16          |
|          |         |          | 287.7 ± 0.1 eV           | C=O          | 3           |
|          |         |          | 289.0 ± 0.1 eV           | O-C=O        | 3           |

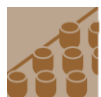

---

|          |   |      |                    |           |     |
|----------|---|------|--------------------|-----------|-----|
|          | O | 10.6 | $532.6 \pm 0.1$ eV | Organic O | 100 |
|          | N | 3.0  | -                  | -         | -   |
| N-rGO-2N |   |      | $284.9 \pm 0.1$ eV | C-C       | 77  |
|          |   |      | $285.0 \pm 0.1$ eV | C-N       | 3   |
|          | C | 83.7 | $286.5 \pm 0.1$ eV | C-O       | 14  |
|          |   |      | $287.8 \pm 0.1$ eV | C=O       | 3   |
|          |   |      | $289.1 \pm 0.1$ eV | O-C=O     | 3   |
|          | O | 10.7 |                    | Organic O | 100 |
|          | N | 3.7  | -                  | -         | -   |
| N-rGO-3N |   |      | $284.7 \pm 0.1$ eV | C-C       | 76  |
|          |   |      | $285.2 \pm 0.1$ eV | C-N       | 4   |
|          | C | 81.5 | $286.3 \pm 0.1$ eV | C-O       | 14  |
|          |   |      | $287.6 \pm 0.1$ eV | C=O       | 2   |
|          |   |      | $288.9 \pm 0.1$ eV | O-C=O     | 4   |
|          | O | 9.5  | $532.2 \pm 0.1$ eV | Organic O | 100 |
|          | N | 8.5  | $398.4 \pm 0.1$ eV | Organic N | 54  |
|          |   |      | $400.4 \pm 0.1$ eV | Organic N | 46  |

---
